# Supplementary material for: Advanced EPI-X4 Derivatives Covalently Bind Human Serum Albumin Resulting in Prolonged Plasma Stability
Source: MDPI journal article supplement (doi:10.3390/ijms232315029), 2022-11-30
Supplement: s1 [file s1]

Supplement

# **Advanced EPI-X4 Derivatives Covalently Bind Human Serum Albumin Resulting in Prolonged Plasma Stability**

**Armando Rodríguez-Alfonso 1,2, Astrid Heck 3, Yasser Bruno Ruiz-Blanco 4, Andrea Gilg 5,  
Ludger Ständker 1,  
Seah Ling Kuan 3, Tanja Weil 3, Elsa Sanchez-Garcia 4, Sebastian Wiese 2, Jan Münch 1,5,\* and  
Mirja Harms 5,\***

- <sup>1</sup> Core Facility Functional Peptidomics, Ulm University Medical Center, 89081 Ulm, Germany
- <sup>2</sup> Core Unit Mass Spectrometry and Proteomics, Ulm University Medical Center, 89081 Ulm, Germany
- <sup>3</sup> Max Planck Institute for Polymer Research, 55128 Mainz, Germany
- <sup>4</sup> Center of Medical Biotechnology, University of Duisburg-Essen, 47057 Duisburg, Germany
- <sup>5</sup> Institute of Molecular Virology, Ulm University Medical Center, 89081 Ulm, Germany

\* Correspondence: jan.muench@uni-ulm.de (J.M.); mirja.harms@uni-ulm.de (M.H.)

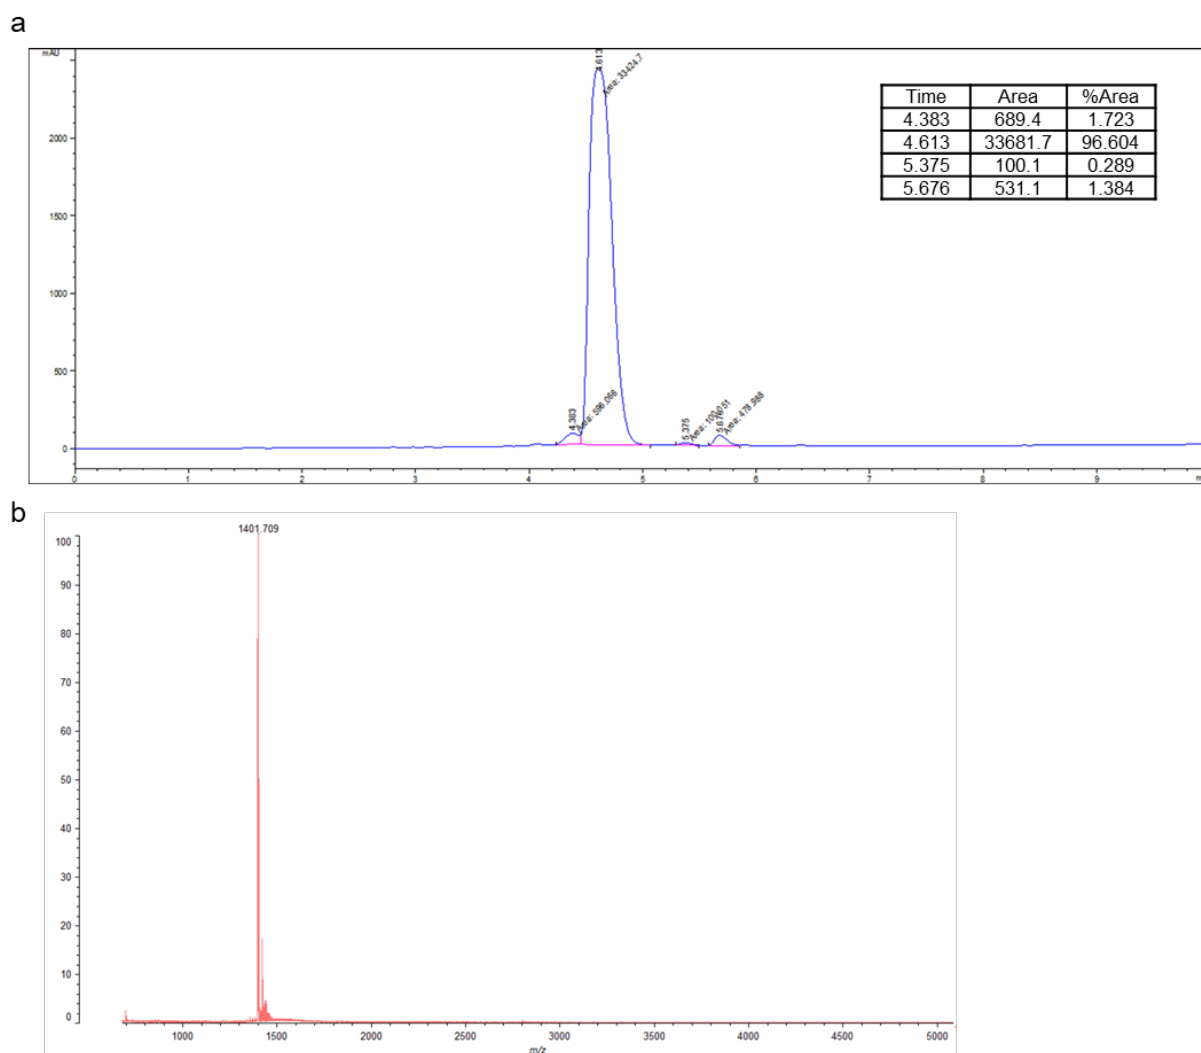

**Figure S1.** (a) RPC18-HPLC analysis of synthetic WSC02 (IVRWSKKVPCVS). WSC02 was applied into a Biobasic 18 column (Thermo Fischer Scientific, USA) of dimensions 2.1 × 100 mm, 5 μm. The peptide was eluted using a gradient of acetonitrile from 5% to 45% in 10 min, at a flow rate of 0.5 mL/min. Elution was monitored by online UV detection at 214 nm. WSC02 purity was 96.6%. (b) The mass spectrometry analysis of synthetic WSC02 was performed with an AXIMA Confidence MALDI-TOF MS system (Shimadzu, Japan). The  $m/z$  value of 1401.709 very closely matched the theoretical monoisotopic  $m/z$  value for this peptide (1401.792).

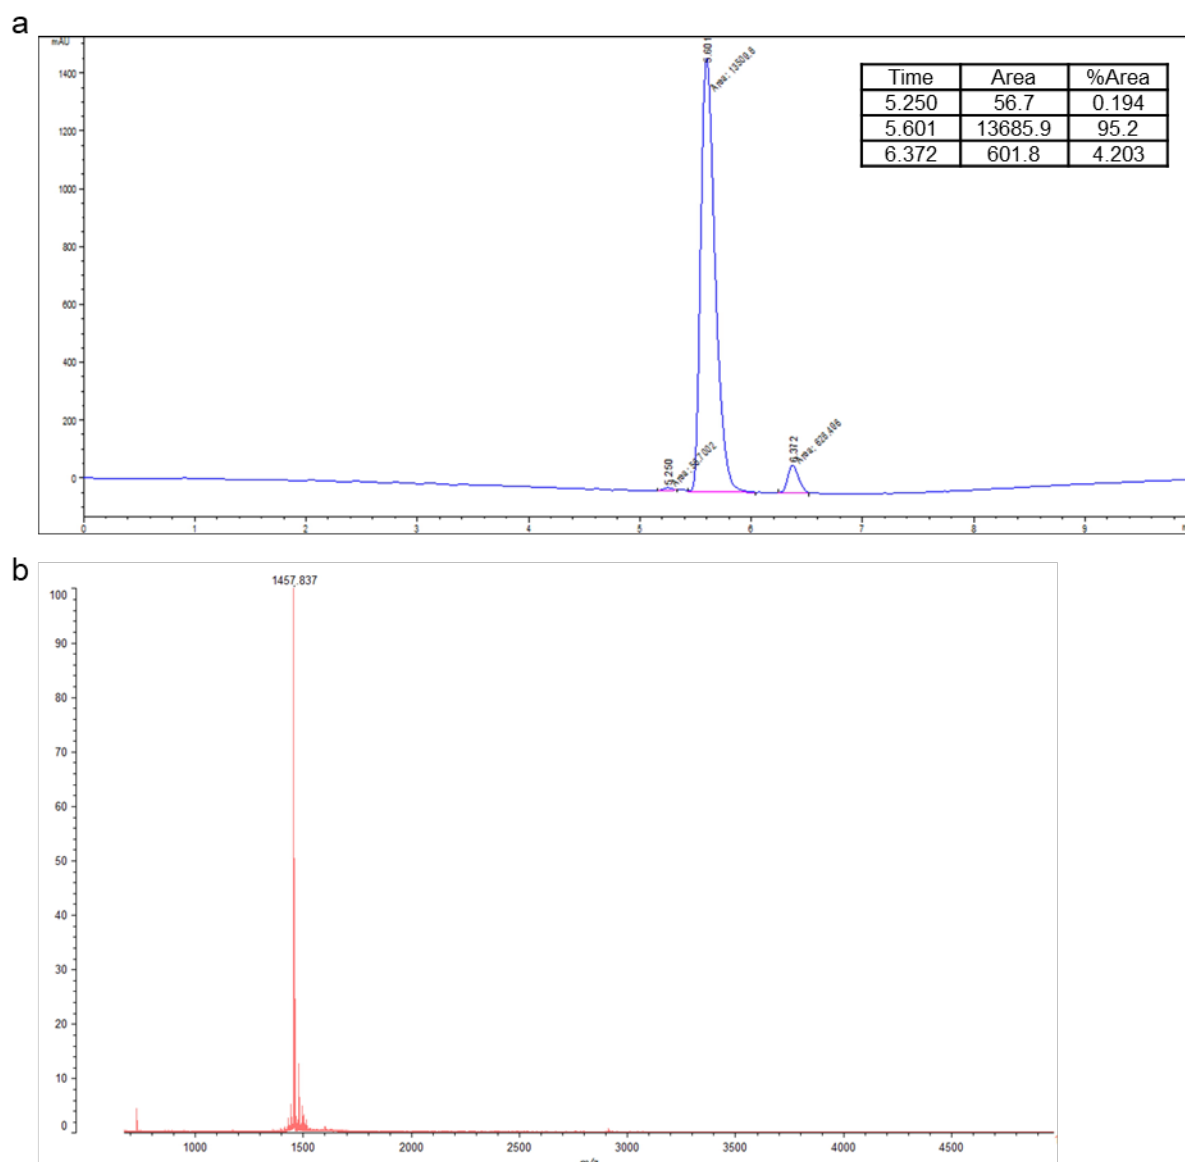

**Figure S2.** (a) RPC18-HPLC analysis of synthetic JM#21 (ILRWSRKLPCVS). JM#21 was applied into a Biobasic 18 column (Thermo Fischer Scientific, USA) of dimensions 2.1 x 100 mm, 5  $\mu$ m. The peptide was eluted using a gradient of acetonitrile from 5% to 45% in 10 min, at a flow rate of 0.5 mL/min. Elution was monitored by online UV detection at 214 nm. JM#21 purity was 95.2%. (b) The mass spectrometry analysis of synthetic JM#21 was performed with an AXIMA Confidence MALDI-TOF MS system (Shimadzu, Japan). The m/z value of 1457.837 very closely matched the theoretical monoisotopic m/z value for this peptide (1457.830).

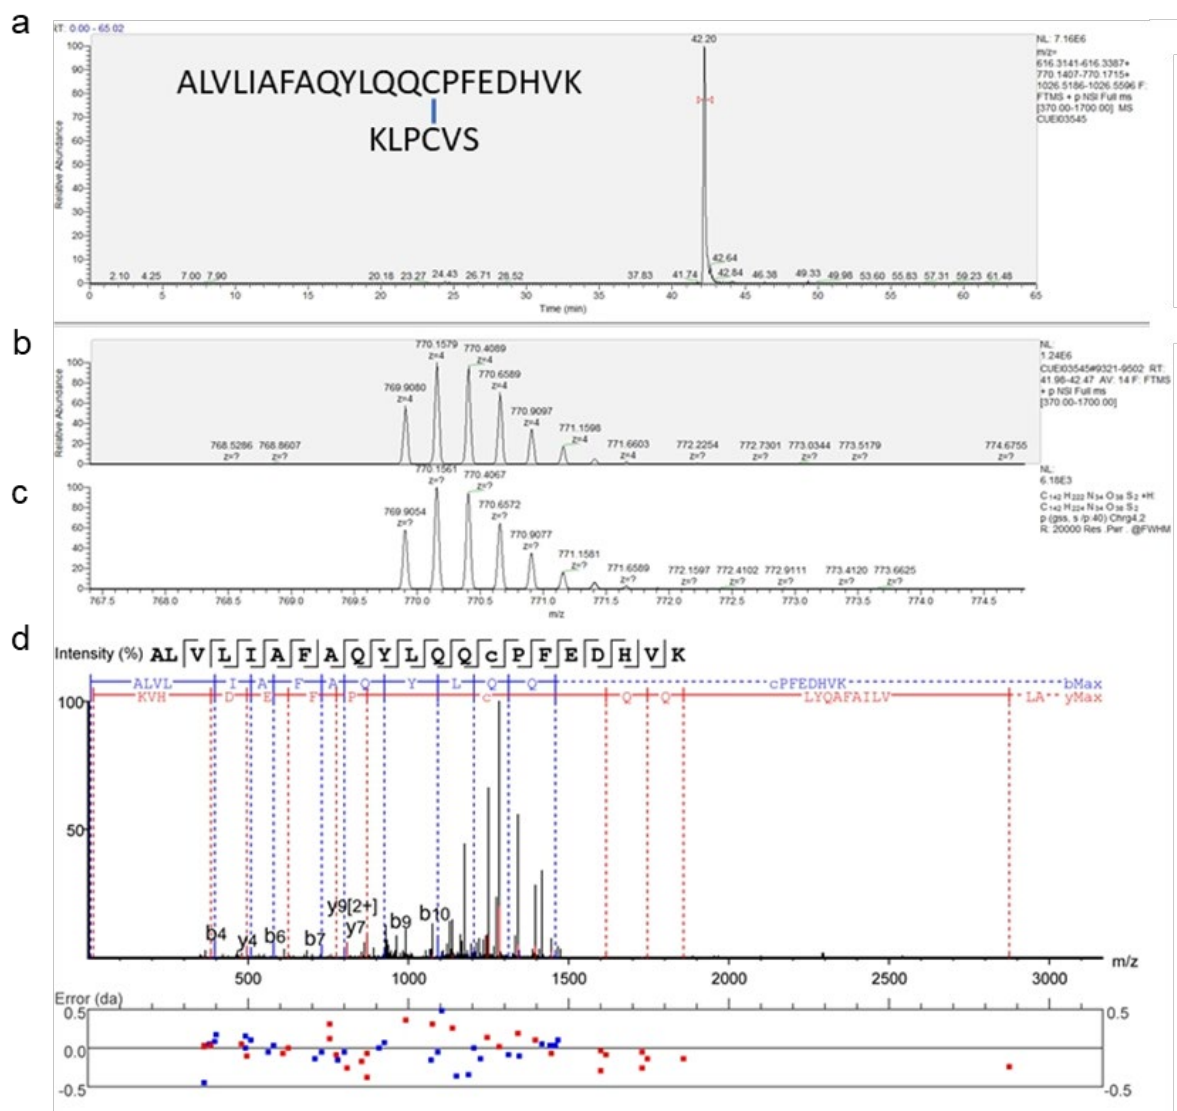

**Figure S3. Identification of the albumin fragment containing Cys34 bound to JM#21 via disulfide bridge, after digestion with Trypsin and MS analysis.** (a) Extracted ion chromatogram to identify the fragment of albumin (ALVLIAFAQYLQQCPFEDHVK), expected to be released from the digestion with Trypsin, bound by disulfide bridge to a fragment (KLPCVS, one missing cleavage, +643.33 Da) of JM#21. (b) Experimental isotopic distribution ( $z=4$ ) of the molecule, which perfectly matches the (c) theoretical isotopic distribution ( $z=4$ ). d) MS/MS spectrum of the fragments bound by a disulfide bridge.

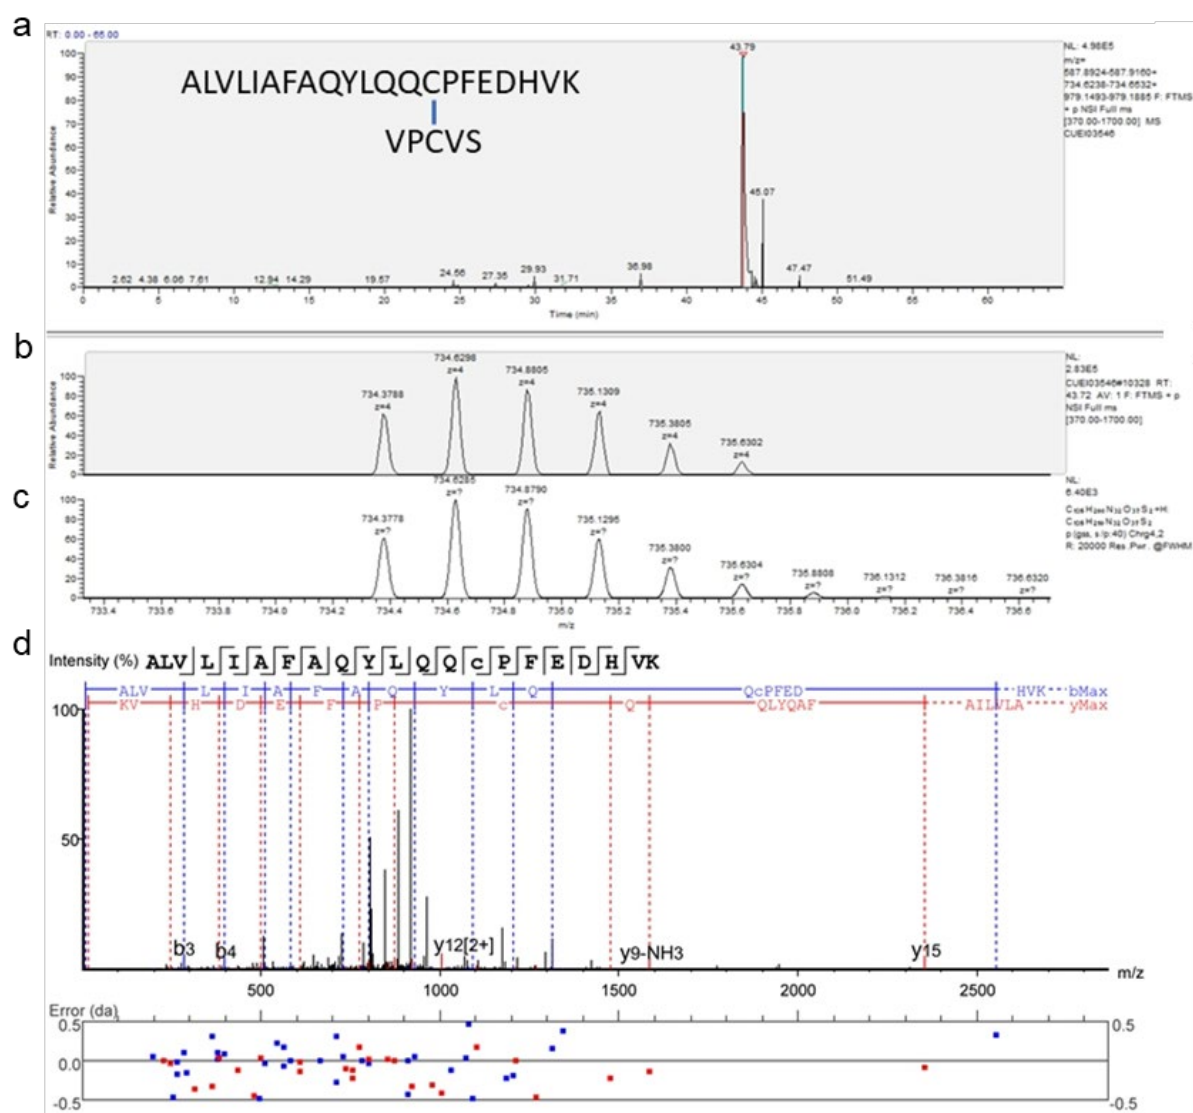

**Figure S4. Identification of the albumin fragment containing Cys34 bound to WSC02 via disulfide bridge, after digestion with Trypsin and MS analysis.** (a) Extracted ion chromatogram to identify the fragment of albumin (ALVLIAFAQYLQQCPFEDHVK), expected to be released from the digestion with Trypsin, bound by disulfide bridge to a fragment (VPCVS, +501.23 Da) of WSC02. (b) Experimental isotopic distribution ( $z=4$ ) of the molecule, which perfectly matches the (c) theoretical isotopic distribution ( $z=4$ ). (d) MS/MS spectrum of the fragments bound by a disulfide bridge.

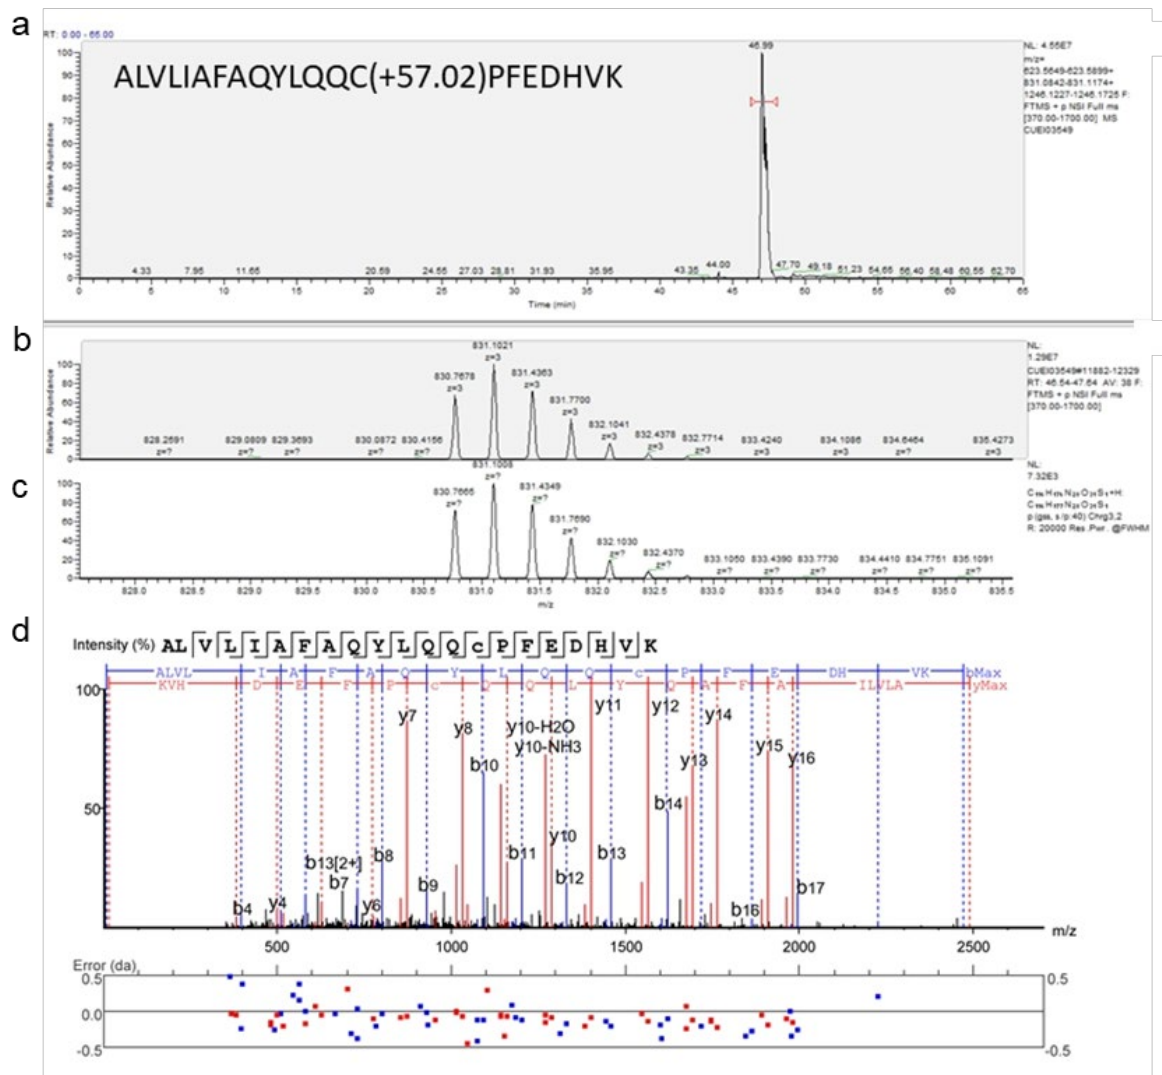

**Figure S5. Carbamidomethylated HAS does not bind peptides via S-S.** (a) Extracted ion chromatogram to identify the fragment of albumin (ALVLIAFAQYLQQCPFEDHVK), expected to be released from the digestion with Trypsin, after carbamidomethylation (+57.02 Da). (b) Experimental isotopic distribution (z=3) of the molecule, which perfectly matches the (c) theoretical isotopic distribution (z=3). (d) MS/MS spectrum of the carbamidomethylated albumin fragment.

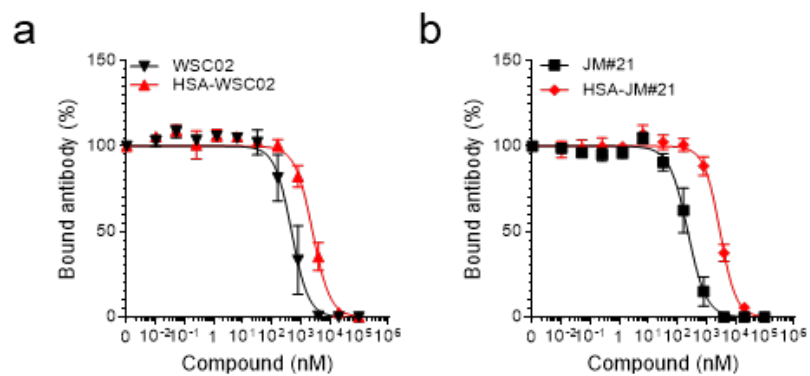

**Figure S6. EPI-X4 WSC02 and JM#21 covalently bound to HSA are biologically active.** Activity of WSC02 (a) or JM#21 (b) conjugates or unconjugated peptides were analyzed using the antibody competition assay. Data derived from 3 individual experiments  $\pm$  SEM are shown.
